# Supplementary material
Source: Springer Nature journal article supplement (https://www.springermedizin.de/resource/supplementary/13012_2012_538_MOESM1_ESM.pdf/9629988)
Supplement: MOESM1 [file 9629988]

**Phase 1:  
Evidence reports**

**Health policy**

Policy making process,  
history, international  
comparisons

**Systematic review**

Safety & effectiveness with  
reference to female age,  
male age & cycle rank

**Ethical analysis**

Constructions of need;  
capacity to benefit, equity

**Economics**

Differences in marginal cost  
by age & cycle rank

**Phase 2:  
Stakeholder engagement**

*Round I: Canvassing range & diversity of opinion*

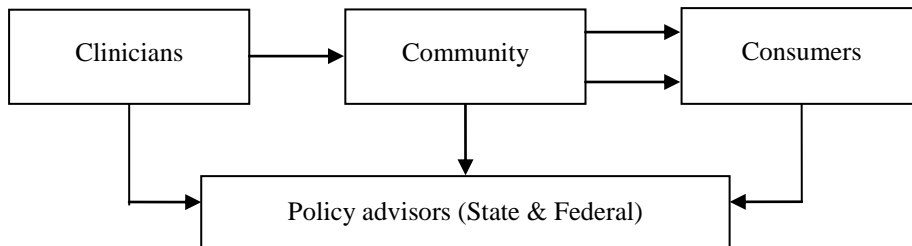

*Round II: Development of consensus/majority funding models  
(incorporating outcomes of Round I & extra evidentiary requests)*

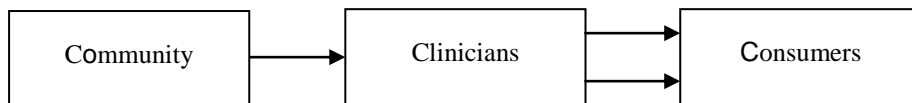

**Phase 3:  
Policy deliberation & analysis  
Process evaluation**

Policy advisors (Federal)
